# Supplementary material for: A high-pressure enhanced coupling effect between graphene electrical contacts and two-dimensional materials thereby improving the performance of their constituent FET devices
Source: Royal Society of Chemistry journal article supplement (doi:10.1039/c9tc04318g), 2019-01-01
Supplement: c9tc04318g1.pdf [file c9tc04318g1.pdf]

*Supporting information for*

**High-pressure enhanced coupling effect between the graphene electrical contacts and two-dimensional materials thereby improving the performance of their constitutes FET devices**

Lijie Zhou,<sup>aΔ</sup> Chuanyang Ge,<sup>bΔ</sup> Huihui Yang,<sup>c</sup> Yi Sun,<sup>b</sup> and Jia Zhang<sup>\* b, c</sup>

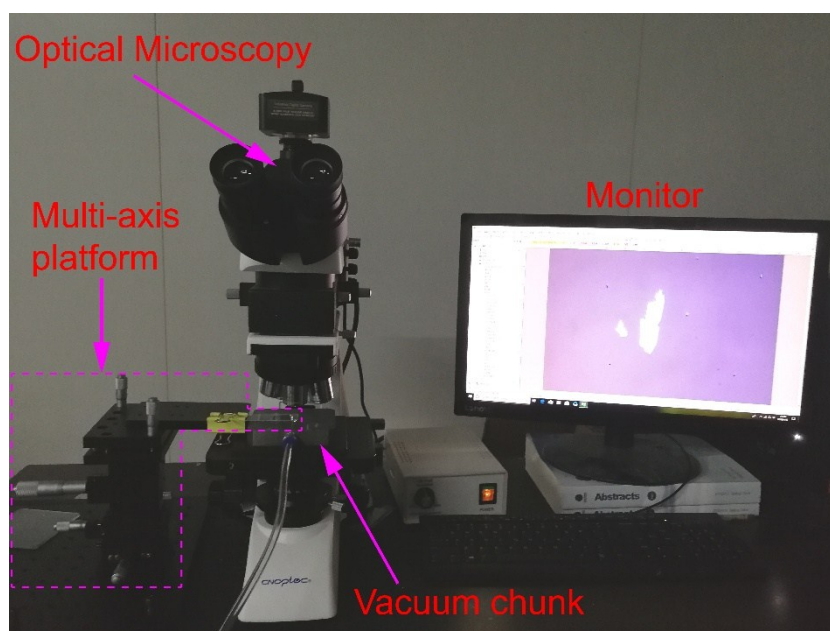

**Fig. S1** Digital picture of home-made dry-transferring setup.

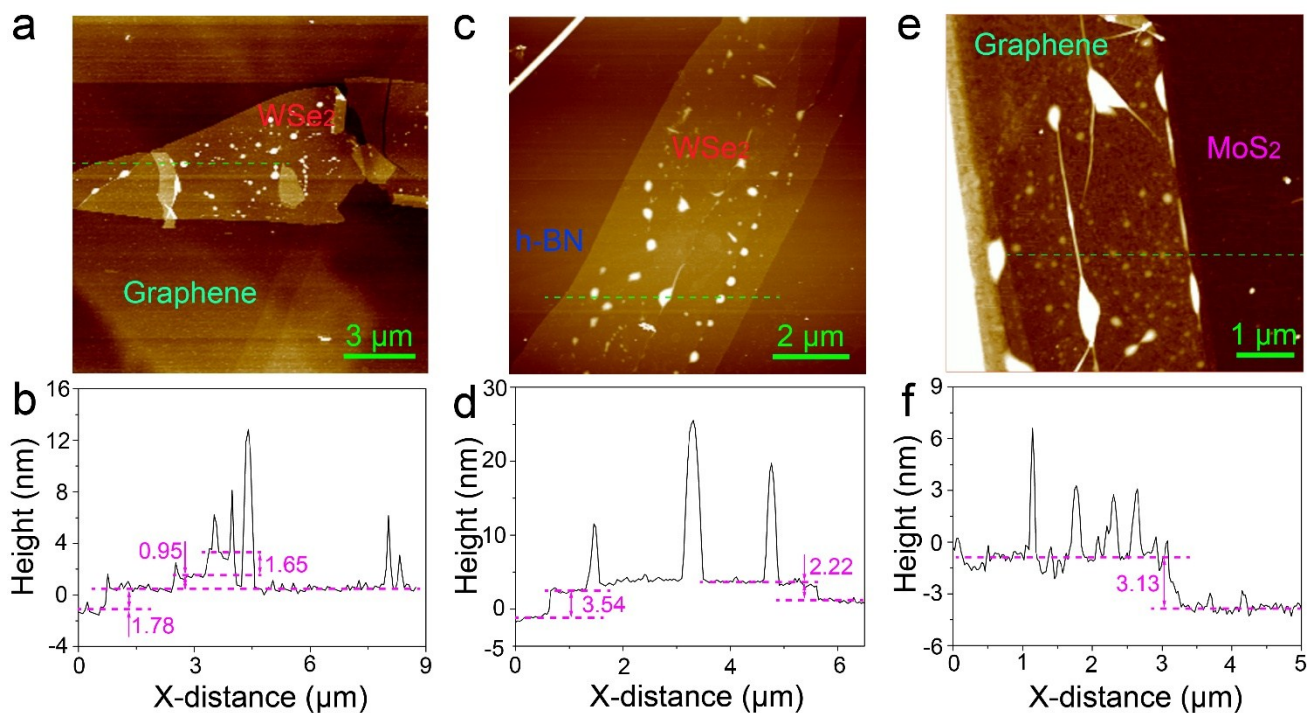

**Fig. S2** AFM image of bubbles formed by transferring exfoliated 2D materials. (a) Multilayer WSe<sub>2</sub> on graphene, (c) Multilayer WSe<sub>2</sub> on h-BN, (e) Single layer graphene on MoS<sub>2</sub>. (b, d, f) Corresponding profile of cross-section line marked in (a, c, e), respectively.

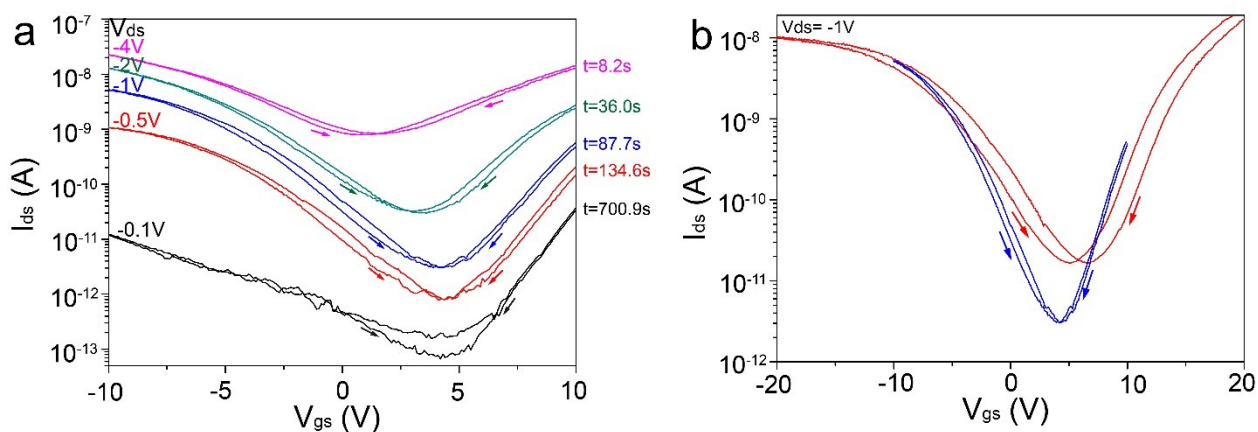

**Fig. S3** Transfer properties of multilayer WSe<sub>2</sub> devices in air at room temperature. (a) V<sub>gs</sub>-I<sub>ds</sub> of the device under dur- sweep of gate voltage from +10 V to -10V under various V<sub>ds</sub>. The time consumption is recorded, resulting in sweep rate of 0.06, 0.30, 0.46, 1.11 and 4.88 V/s for V<sub>ds</sub>=-0.1, -0.5, -1, -2 and -4 V, respectively. (b) V<sub>gs</sub>-I<sub>ds</sub> of the device at the gate voltage sweeping from +20 to -20 V and +10 V to -10 V, respectively.

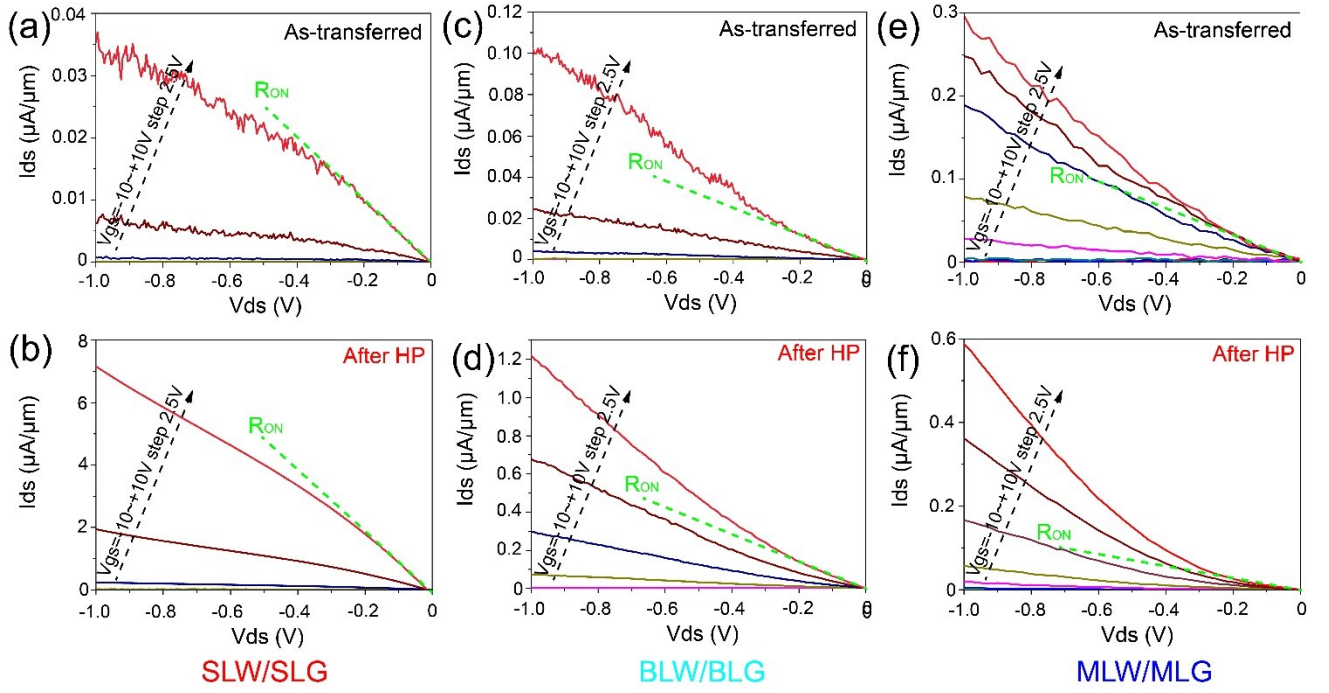

**Fig. S4** The output ( $I_{ds}$ - $V_{ds}$ ) curves of SLW, BLW and MLW based FET device before and after HP treatment. (a, b), (c, d) and (e, f) are the  $I_{ds}$ - $V_{ds}$  curves SLW, BLW and MLW based FET device before and after HP treatment, respectively. The back-gate voltage sweeps from -10 V to 10 V with a step of 2.5 V.

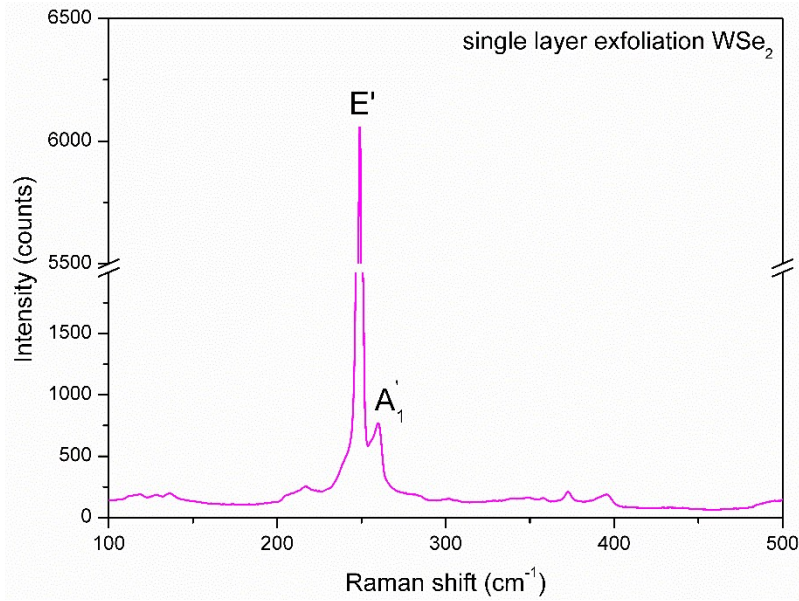

**Fig. S5** Raman spectrum of single layer exfoliation WSe<sub>2</sub> flake

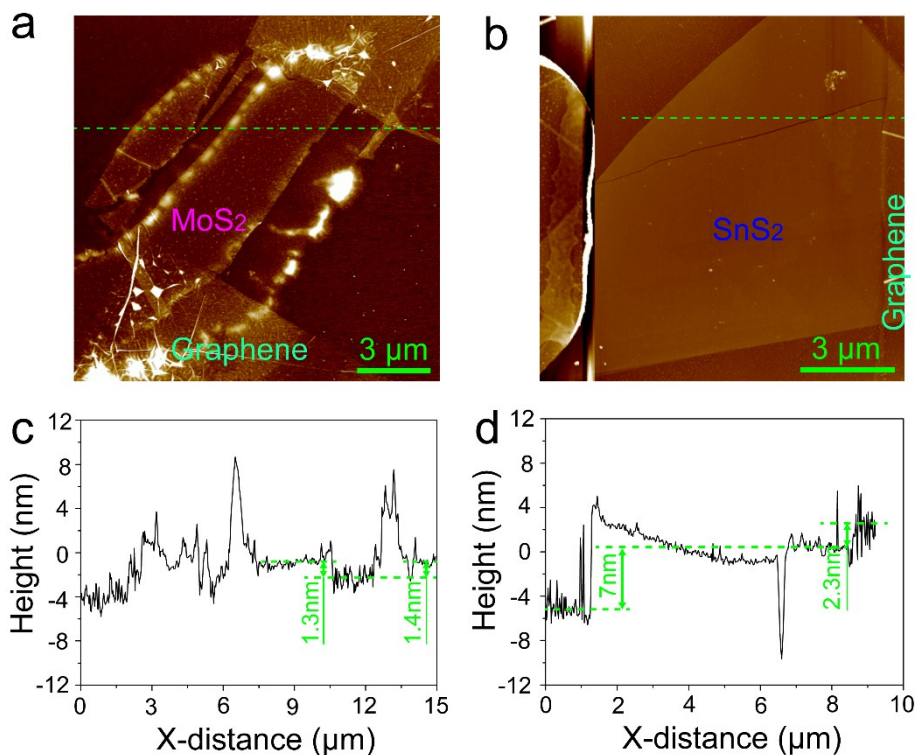

**Fig. S6** AFM characterization of device structure. (a) AFM image of SLG/SLMo device. (b) MLG/MLSn device. (c) Profile of green dot line in (a), resulting the thickness of MoS<sub>2</sub> and graphene electrodes are 1.3 nm and 1.4 nm, respectively. (d) Profile of green dot line in (b), resulting the thickness of SnS<sub>2</sub> and graphene electrodes are 7 nm and 2.3 nm, respectively.

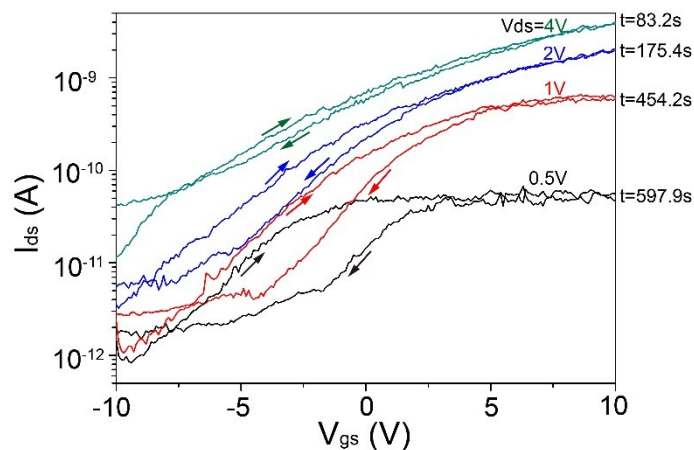

**Fig. S7** Transfer properties ( $V_{gs}$ - $I_{ds}$ ) of multilayer SnS<sub>2</sub> devices in air at room temperature. The device was measured under sweeping gate voltage from -10 V to +10 V and back to -10 V under various  $V_{ds}$ . The time consumption is recorded, resulting in sweep rate of 0.07, 0.09, 0.23 and 0.48 V/s for  $V_{ds}=0.5$ , 1, 2 and 4 V, respectively.
